# Supplementary material for: Gcn4 misregulation reveals a direct role for the evolutionary conserved EKC/KEOPS in the t6A modification of tRNAs
Source: PubMed Central journal article supplement — Nucleic Acids Res. 2011 Apr 1;39(14):6148–60. doi: 10.1093/nar/gkr178 (PMC3152333; doi:10.1093/nar/gkr178), 2011-04-01
Supplement: supp_gkr178_suppl_table_2.pdf [file supp_gkr178_suppl_table_2.pdf]

| Genelist    | GO-biological process                                                                       | Corrected p-value | Overlap | Genelist | Frequency genelist | GO-term | Background | Frequency background |
|-------------|---------------------------------------------------------------------------------------------|-------------------|---------|----------|--------------------|---------|------------|----------------------|
| down pcc1-4 | alcohol metabolic process (GO:0006066)                                                      | 0.005749336       | 13      | 161      | 8.074534161        | 241     | 6609       | 3.646542593          |
| down pcc1-4 | amine metabolic process (GO:0009308)                                                        | 0.002960473       | 16      | 161      | 9.937888199        | 305     | 6609       | 4.61491905           |
| down pcc1-4 | biosynthetic process (GO:0009058)                                                           | 0.002974003       | 72      | 161      | 44.72049689        | 2253    | 6609       | 34.08987744          |
| down pcc1-4 | cellular amine metabolic process (GO:0044106)                                               | 0.000905359       | 16      | 161      | 9.937888199        | 272     | 6609       | 4.115593999          |
| down pcc1-4 | cellular amino acid and derivative metabolic process (GO:0006519)                           | 0.001736356       | 17      | 161      | 10.55900621        | 317     | 6609       | 4.796489635          |
| down pcc1-4 | cellular amino acid derivative metabolic process (GO:0006575)                               | 0.001742501       | 7       | 161      | 4.347826087        | 72      | 6609       | 1.089423513          |
| down pcc1-4 | cellular biogenic amine metabolic process (GO:0006576)                                      | 0.001870693       | 5       | 161      | 3.105590062        | 37      | 6609       | 0.559842639          |
| down pcc1-4 | cellular biosynthetic process (GO:0044249)                                                  | 0.003199581       | 71      | 161      | 44.09937888        | 2220    | 6609       | 33.59055833          |
| down pcc1-4 | cellular lipid metabolic process (GO:0044255)                                               | 0.006367008       | 13      | 161      | 8.074534161        | 244     | 6609       | 3.69193524           |
| down pcc1-4 | cellular metabolic compound salvage (GO:0043094)                                            | 0.000864511       | 7       | 161      | 4.347826087        | 64      | 6609       | 0.968376456          |
| down pcc1-4 | copper ion transport (GO:0006825)                                                           | 0.00629241        | 3       | 161      | 1.863354037        | 16      | 6609       | 0.242094114          |
| down pcc1-4 | di-, tri-valent inorganic cation transport (GO:0015674)                                     | 0.004934717       | 5       | 161      | 3.105590062        | 46      | 6609       | 0.696020578          |
| down pcc1-4 | establishment of ribosome localization (GO:0033753)                                         | 0.003674036       | 5       | 161      | 3.105590062        | 43      | 6609       | 0.650627932          |
| down pcc1-4 | ethanolamine and derivative metabolic process (GO:0042439)                                  | 0.000280652       | 4       | 161      | 2.48447205         | 14      | 6609       | 0.21183235           |
| down pcc1-4 | glycerolipid biosynthetic process (GO:0045017)                                              | 0.001869977       | 6       | 161      | 3.726708075        | 54      | 6609       | 0.817067635          |
| down pcc1-4 | glycerolipid metabolic process (GO:0046486)                                                 | 0.00510172        | 7       | 161      | 4.347826087        | 87      | 6609       | 1.316386745          |
| down pcc1-4 | glycerophospholipid biosynthetic process (GO:0046474)                                       | 0.001534183       | 6       | 161      | 3.726708075        | 52      | 6609       | 0.786805871          |
| down pcc1-4 | glycerophospholipid metabolic process (GO:0006650)                                          | 0.00319521        | 7       | 161      | 4.347826087        | 80      | 6609       | 1.21047057           |
| down pcc1-4 | intracellular copper ion transport (GO:0015680)                                             | 0.003426547       | 2       | 161      | 1.242236025        | 4       | 6609       | 0.060523529          |
| down pcc1-4 | iron ion transmembrane transport (GO:0034755)                                               | 0.005619641       | 2       | 161      | 1.242236025        | 5       | 6609       | 0.075654411          |
| down pcc1-4 | iron ion transport (GO:0006826)                                                             | 0.000820214       | 5       | 161      | 3.105590062        | 31      | 6609       | 0.469057346          |
| down pcc1-4 | lipid biosynthetic process (GO:0008610)                                                     | 0.004611475       | 10      | 161      | 6.211180124        | 156     | 6609       | 2.360417612          |
| down pcc1-4 | maturation of SSU-rRNA from tricistronic rRNA transcript (SSU-rRNA, 5.8S rRNA, LSU-rRNA) (G | 0.009676512       | 7       | 161      | 4.347826087        | 98      | 6609       | 1.482826449          |
| down pcc1-4 | ncRNA metabolic process (GO:0034660)                                                        | 0.001367697       | 23      | 161      | 14.28571429        | 483     | 6609       | 7.308216069          |
| down pcc1-4 | ncRNA processing (GO:0034470)                                                               | 0.001376124       | 21      | 161      | 13.04347826        | 424     | 6609       | 6.415494023          |
| down pcc1-4 | nuclear import (GO:0051170)                                                                 | 0.009746055       | 5       | 161      | 3.105590062        | 54      | 6609       | 0.817067635          |
| down pcc1-4 | nuclear transport (GO:0051169)                                                              | 0.003163874       | 10      | 161      | 6.211180124        | 148     | 6609       | 2.239370555          |
| down pcc1-4 | nucleocytoplasmic transport (GO:0006913)                                                    | 0.003163874       | 10      | 161      | 6.211180124        | 148     | 6609       | 2.239370555          |
| down pcc1-4 | nucleoside diphosphate metabolic process (GO:0009132)                                       | 0.008295008       | 2       | 161      | 1.242236025        | 6       | 6609       | 0.090785293          |
| down pcc1-4 | organelle assembly (GO:0070925)                                                             | 0.000372166       | 9       | 161      | 5.590062112        | 92      | 6609       | 1.392041156          |
| down pcc1-4 | organophosphate metabolic process (GO:0019637)                                              | 0.000783925       | 10      | 161      | 6.211180124        | 123     | 6609       | 1.861098502          |
| down pcc1-4 | phosphatidylcholine biosynthetic process (GO:0006656)                                       | 6.36E-05          | 4       | 161      | 2.48447205         | 10      | 6609       | 0.151308821          |
| down pcc1-4 | phosphatidylcholine metabolic process (GO:0046470)                                          | 0.000144183       | 4       | 161      | 2.48447205         | 12      | 6609       | 0.181570586          |
| down pcc1-4 | phosphatidylserine metabolic process (GO:0006658)                                           | 0.001741154       | 2       | 161      | 1.242236025        | 3       | 6609       | 0.045392646          |
| down pcc1-4 | phospholipid biosynthetic process (GO:0008654)                                              | 8.51E-05          | 9       | 161      | 5.590062112        | 76      | 6609       | 1.149947042          |
| down pcc1-4 | phospholipid metabolic process (GO:0006644)                                                 | 0.000604302       | 10      | 161      | 6.211180124        | 119     | 6609       | 1.800574974          |
| down pcc1-4 | posttranscriptional regulation of gene expression (GO:0010608)                              | 0.000512055       | 14      | 161      | 8.695652174        | 208     | 6609       | 3.147223483          |
| down pcc1-4 | protein import into nucleus (GO:0006606)                                                    | 0.009746055       | 5       | 161      | 3.105590062        | 54      | 6609       | 0.817067635          |
| down pcc1-4 | regulation of cellular protein metabolic process (GO:0032268)                               | 0.000217997       | 15      | 161      | 9.316770186        | 215     | 6609       | 3.253139658          |
| down pcc1-4 | regulation of protein metabolic process (GO:0051246)                                        | 0.003272535       | 15      | 161      | 9.316770186        | 280     | 6609       | 4.236646997          |
| down pcc1-4 | regulation of translation (GO:0006417)                                                      | 0.000225212       | 14      | 161      | 8.695652174        | 192     | 6609       | 2.905129369          |
| down pcc1-4 | ribonucleoprotein complex assembly (GO:0022618)                                             | 0.004084091       | 9       | 161      | 5.590062112        | 129     | 6609       | 1.951883795          |
| down pcc1-4 | ribonucleoprotein complex biogenesis (GO:0022613)                                           | 0.000179658       | 26      | 161      | 16.14906832        | 503     | 6609       | 7.610833712          |
| down pcc1-4 | ribosomal large subunit assembly (GO:0000027)                                               | 2.74E-07          | 9       | 161      | 5.590062112        | 39      | 6609       | 0.590104403          |
| down pcc1-4 | ribosomal large subunit biogenesis (GO:0042273)                                             | 3.28E-09          | 14      | 161      | 8.695652174        | 77      | 6609       | 1.165077924          |
| down pcc1-4 | ribosomal subunit assembly (GO:0042257)                                                     | 5.88E-06          | 9       | 161      | 5.590062112        | 55      | 6609       | 0.832198517          |
| down pcc1-4 | ribosomal subunit export from nucleus (GO:0000054)                                          | 0.003674036       | 5       | 161      | 3.105590062        | 43      | 6609       | 0.650627932          |
| down pcc1-4 | ribosome assembly (GO:0042255)                                                              | 4.94E-05          | 9       | 161      | 5.590062112        | 71      | 6609       | 1.074292631          |
| down pcc1-4 | ribosome biogenesis (GO:0042254)                                                            | 2.58E-05          | 26      | 161      | 16.14906832        | 448     | 6609       | 6.778635194          |
| down pcc1-4 | ribosome localization (GO:0033750)                                                          | 0.003674036       | 5       | 161      | 3.105590062        | 43      | 6609       | 0.650627932          |
| down pcc1-4 | rRNA metabolic process (GO:0016072)                                                         | 0.000484991       | 19      | 161      | 11.80124224        | 336     | 6609       | 5.083976396          |
| down pcc1-4 | rRNA processing (GO:0006364)                                                                | 0.000331998       | 19      | 161      | 11.80124224        | 326     | 6609       | 4.932667575          |
| down pcc1-4 | transition metal ion transport (GO:0000041)                                                 | 0.002057416       | 6       | 161      | 3.726708075        | 55      | 6609       | 0.832198517          |
| down pcc1-4 | translation (GO:0006412)                                                                    | 0.000333234       | 40      | 161      | 24.8447205         | 961     | 6609       | 14.54077773          |
| up pcc1-4   | acetyl-CoA catabolic process (GO:0046356)                                                   | 3.38E-06          | 11      | 471      | 2.335456476        | 30      | 6609       | 0.453926464          |
| up pcc1-4   | acetyl-CoA metabolic process (GO:0006084)                                                   | 7.43E-05          | 11      | 471      | 2.335456476        | 40      | 6609       | 0.605235285          |
| up pcc1-4   | aerobic respiration (GO:0009060)                                                            | 5.67E-12          | 30      | 471      | 6.369426752        | 101     | 6609       | 1.528219095          |

|           |                                                                    |             |     |     |             |      |      |             |
|-----------|--------------------------------------------------------------------|-------------|-----|-----|-------------|------|------|-------------|
| up pcc1-4 | alcohol catabolic process (GO:0046164)                             | 0.00021001  | 14  | 471 | 2.972399151 | 67   | 6609 | 1.013769103 |
| up pcc1-4 | alcohol metabolic process (GO:0006066)                             | 8.27E-05    | 34  | 471 | 7.218663652 | 241  | 6609 | 3.646542593 |
| up pcc1-4 | allantoin catabolic process (GO:0000256)                           | 0.000749517 | 4   | 471 | 0.8492569   | 7    | 6609 | 0.105916175 |
| up pcc1-4 | allantoin metabolic process (GO:0000255)                           | 0.000749517 | 4   | 471 | 0.8492569   | 7    | 6609 | 0.105916175 |
| up pcc1-4 | amide transport (GO:0042886)                                       | 0.003226616 | 3   | 471 | 0.636942675 | 5    | 6609 | 0.075654411 |
| up pcc1-4 | amine biosynthetic process (GO:0009309)                            | 2.21E-32    | 60  | 471 | 12.7388535  | 143  | 6609 | 2.163716145 |
| up pcc1-4 | amine catabolic process (GO:0009310)                               | 4.77E-06    | 14  | 471 | 2.972399151 | 49   | 6609 | 0.741413224 |
| up pcc1-4 | amine metabolic process (GO:0009308)                               | 2.85E-30    | 85  | 471 | 18.04670913 | 305  | 6609 | 4.61491905  |
| up pcc1-4 | amine transport (GO:0015837)                                       | 0.000762706 | 12  | 471 | 2.547770701 | 59   | 6609 | 0.892722046 |
| up pcc1-4 | amino acid transport (GO:0006865)                                  | 0.007954943 | 9   | 471 | 1.910828025 | 50   | 6609 | 0.756544107 |
| up pcc1-4 | arginine biosynthetic process (GO:0006526)                         | 3.18E-11    | 10  | 471 | 2.123142251 | 11   | 6609 | 0.166439703 |
| up pcc1-4 | arginine metabolic process (GO:0006525)                            | 6.68E-11    | 12  | 471 | 2.547770701 | 17   | 6609 | 0.257224996 |
| up pcc1-4 | aromatic amino acid family biosynthetic process (GO:0009073)       | 5.17E-06    | 7   | 471 | 1.486199575 | 12   | 6609 | 0.181570586 |
| up pcc1-4 | aromatic amino acid family metabolic process (GO:0009072)          | 9.11E-07    | 10  | 471 | 2.123142251 | 22   | 6609 | 0.332879407 |
| up pcc1-4 | aromatic compound biosynthetic process (GO:0019438)                | 1.86E-05    | 11  | 471 | 2.335456476 | 35   | 6609 | 0.529580875 |
| up pcc1-4 | aspartate family amino acid biosynthetic process (GO:0009067)      | 4.29E-10    | 19  | 471 | 4.033970276 | 50   | 6609 | 0.756544107 |
| up pcc1-4 | aspartate family amino acid metabolic process (GO:0009066)         | 2.44E-10    | 22  | 471 | 4.670912951 | 65   | 6609 | 0.983507338 |
| up pcc1-4 | ATP biosynthetic process (GO:0006754)                              | 0.000290082 | 11  | 471 | 2.335456476 | 46   | 6609 | 0.696020578 |
| up pcc1-4 | ATP metabolic process (GO:0046034)                                 | 0.000354876 | 11  | 471 | 2.335456476 | 47   | 6609 | 0.71115146  |
| up pcc1-4 | ATP synthesis coupled electron transport (GO:0042773)              | 1.42E-17    | 20  | 471 | 4.246284501 | 28   | 6609 | 0.4236647   |
| up pcc1-4 | ATP synthesis coupled proton transport (GO:0015986)                | 3.38E-06    | 11  | 471 | 2.335456476 | 30   | 6609 | 0.453926464 |
| up pcc1-4 | branched chain family amino acid biosynthetic process (GO:0009082) | 6.39E-08    | 9   | 471 | 1.910828025 | 14   | 6609 | 0.21183235  |
| up pcc1-4 | branched chain family amino acid metabolic process (GO:0009081)    | 1.51E-06    | 10  | 471 | 2.123142251 | 23   | 6609 | 0.348010289 |
| up pcc1-4 | carbohydrate catabolic process (GO:0016052)                        | 8.62E-06    | 22  | 471 | 4.670912951 | 111  | 6609 | 1.679527916 |
| up pcc1-4 | carbohydrate metabolic process (GO:0005975)                        | 0.000155908 | 44  | 471 | 9.341825902 | 353  | 6609 | 5.341201392 |
| up pcc1-4 | carboxylic acid biosynthetic process (GO:0046394)                  | 1.32E-33    | 68  | 471 | 14.4373673  | 178  | 6609 | 2.693297019 |
| up pcc1-4 | carboxylic acid catabolic process (GO:0046395)                     | 8.48E-06    | 15  | 471 | 3.184713376 | 58   | 6609 | 0.877591164 |
| up pcc1-4 | carboxylic acid metabolic process (GO:0019752)                     | 1.97E-35    | 103 | 471 | 21.86836518 | 383  | 6609 | 5.795127856 |
| up pcc1-4 | carboxylic acid transport (GO:0046942)                             | 0.004497594 | 12  | 471 | 2.547770701 | 72   | 6609 | 1.089423513 |
| up pcc1-4 | cardiolipin metabolic process (GO:0032048)                         | 0.000120246 | 4   | 471 | 0.8492569   | 5    | 6609 | 0.075654411 |
| up pcc1-4 | catabolic process (GO:0009056)                                     | 4.17E-09    | 100 | 471 | 21.23142251 | 801  | 6609 | 12.11983659 |
| up pcc1-4 | cell death (GO:0008219)                                            | 3.01E-19    | 28  | 471 | 5.944798301 | 52   | 6609 | 0.786805871 |
| up pcc1-4 | cellular aldehyde metabolic process (GO:0006081)                   | 8.92E-05    | 9   | 471 | 1.910828025 | 28   | 6609 | 0.4236647   |
| up pcc1-4 | cellular amide catabolic process (GO:0043605)                      | 8.42E-05    | 5   | 471 | 1.061571125 | 8    | 6609 | 0.121047057 |
| up pcc1-4 | cellular amide metabolic process (GO:0043603)                      | 0.000430735 | 7   | 471 | 1.486199575 | 21   | 6609 | 0.317748525 |
| up pcc1-4 | cellular amine metabolic process (GO:0044106)                      | 3.00E-30    | 80  | 471 | 16.985138   | 272  | 6609 | 4.115599939 |
| up pcc1-4 | cellular amino acid and derivative metabolic process (GO:0006519)  | 5.76E-42    | 101 | 471 | 21.44373673 | 317  | 6609 | 4.796489635 |
| up pcc1-4 | cellular amino acid biosynthetic process (GO:0008652)              | 4.11E-34    | 60  | 471 | 12.7388535  | 135  | 6609 | 2.042669088 |
| up pcc1-4 | cellular amino acid catabolic process (GO:0009063)                 | 9.14E-06    | 13  | 471 | 2.760084926 | 45   | 6609 | 0.680889696 |
| up pcc1-4 | cellular amino acid derivative catabolic process (GO:0042219)      | 0.009061305 | 5   | 471 | 1.061571125 | 19   | 6609 | 0.28748676  |
| up pcc1-4 | cellular amino acid derivative metabolic process (GO:0006575)      | 0.000461229 | 14  | 471 | 2.972399151 | 72   | 6609 | 1.089423513 |
| up pcc1-4 | cellular amino acid metabolic process (GO:0006520)                 | 1.40E-31    | 78  | 471 | 16.56050955 | 249  | 6609 | 3.76758965  |
| up pcc1-4 | cellular aromatic compound metabolic process (GO:0006725)          | 1.30E-44    | 72  | 471 | 15.2866242  | 147  | 6609 | 2.224239673 |
| up pcc1-4 | cellular biogenic amine metabolic process (GO:0006576)             | 0.003837754 | 8   | 471 | 1.6985138   | 37   | 6609 | 0.559842639 |
| up pcc1-4 | cellular carbohydrate catabolic process (GO:0044275)               | 2.36E-06    | 22  | 471 | 4.670912951 | 103  | 6609 | 1.558480859 |
| up pcc1-4 | cellular carbohydrate metabolic process (GO:0044262)               | 3.16E-05    | 43  | 471 | 9.129511677 | 320  | 6609 | 4.841882282 |
| up pcc1-4 | cellular catabolic process (GO:0044248)                            | 8.22E-08    | 85  | 471 | 18.04670913 | 681  | 6609 | 10.30413073 |
| up pcc1-4 | cellular glucan metabolic process (GO:0006073)                     | 0.007392357 | 8   | 471 | 1.6985138   | 41   | 6609 | 0.620366167 |
| up pcc1-4 | cellular ketone metabolic process (GO:0042180)                     | 1.09E-34    | 104 | 471 | 22.08067941 | 397  | 6609 | 6.006960206 |
| up pcc1-4 | cellular metabolic process (GO:0044237)                            | 0.002331496 | 311 | 471 | 66.02972399 | 3953 | 6609 | 59.81237706 |
| up pcc1-4 | cellular nitrogen compound biosynthetic process (GO:0044271)       | 4.03E-32    | 89  | 471 | 18.89596603 | 316  | 6609 | 4.781358753 |
| up pcc1-4 | cellular nitrogen compound catabolic process (GO:0044270)          | 0.007000137 | 6   | 471 | 1.27388535  | 25   | 6609 | 0.378272053 |
| up pcc1-4 | cellular nitrogen compound metabolic process (GO:0034641)          | 8.51E-07    | 191 | 471 | 40.55201699 | 2012 | 6609 | 30.44333485 |
| up pcc1-4 | cellular protein catabolic process (GO:0044257)                    | 0.00016515  | 39  | 471 | 8.280254777 | 301  | 6609 | 4.554395521 |
| up pcc1-4 | cellular respiration (GO:0045333)                                  | 1.07E-17    | 40  | 471 | 8.492569002 | 119  | 6609 | 1.800574974 |
| up pcc1-4 | cellular response to external stimulus (GO:0071496)                | 0.008628394 | 12  | 471 | 2.547770701 | 78   | 6609 | 1.180208806 |
| up pcc1-4 | cellular response to extracellular stimulus (GO:0031668)           | 0.008628394 | 12  | 471 | 2.547770701 | 78   | 6609 | 1.180208806 |
| up pcc1-4 | cellular response to water deprivation (GO:0042631)                | 0.000359817 | 3   | 471 | 0.636942675 | 3    | 6609 | 0.045392646 |

|           |                                                                             |             |     |     |             |      |      |             |
|-----------|-----------------------------------------------------------------------------|-------------|-----|-----|-------------|------|------|-------------|
| up pcc1-4 | chorismate metabolic process (GO:0046417)                                   | 5.17E-06    | 7   | 471 | 1.486199575 | 12   | 6609 | 0.181570586 |
| up pcc1-4 | coenzyme catabolic process (GO:0009109)                                     | 1.93E-06    | 12  | 471 | 2.547770701 | 34   | 6609 | 0.514449992 |
| up pcc1-4 | coenzyme metabolic process (GO:0006732)                                     | 1.94E-06    | 29  | 471 | 6.157112527 | 159  | 6609 | 2.405810259 |
| up pcc1-4 | cofactor catabolic process (GO:0051187)                                     | 2.74E-06    | 12  | 471 | 2.547770701 | 35   | 6609 | 0.529580875 |
| up pcc1-4 | cofactor metabolic process (GO:0051186)                                     | 4.03E-12    | 46  | 471 | 9.766454352 | 213  | 6609 | 3.222877894 |
| up pcc1-4 | crisetae formation (GO:0042407)                                             | 1.80E-06    | 5   | 471 | 1.061571125 | 5    | 6609 | 0.075654411 |
| up pcc1-4 | cysteine biosynthetic process (GO:0019344)                                  | 0.000936028 | 5   | 471 | 1.061571125 | 12   | 6609 | 0.181570586 |
| up pcc1-4 | cysteine metabolic process (GO:0006534)                                     | 3.47E-05    | 7   | 471 | 1.486199575 | 15   | 6609 | 0.226963232 |
| up pcc1-4 | death (GO:0016265)                                                          | 3.01E-19    | 28  | 471 | 5.944798301 | 52   | 6609 | 0.786805871 |
| up pcc1-4 | dicarboxylic acid metabolic process (GO:0043648)                            | 9.82E-09    | 12  | 471 | 2.547770701 | 23   | 6609 | 0.348010289 |
| up pcc1-4 | dipeptide transport (GO:0042938)                                            | 0.005068891 | 2   | 471 | 0.42462845  | 2    | 6609 | 0.030261764 |
| up pcc1-4 | disaccharide catabolic process (GO:0046352)                                 | 0.005228074 | 7   | 471 | 1.486199575 | 31   | 6609 | 0.469057346 |
| up pcc1-4 | disaccharide metabolic process (GO:0005984)                                 | 0.000839446 | 10  | 471 | 2.123142251 | 44   | 6609 | 0.665758814 |
| up pcc1-4 | drug transmembrane transport (GO:0006855)                                   | 0.005613326 | 4   | 471 | 0.8492569   | 11   | 6609 | 0.166439703 |
| up pcc1-4 | drug transport (GO:0015893)                                                 | 0.000305716 | 7   | 471 | 1.486199575 | 20   | 6609 | 0.302617643 |
| up pcc1-4 | electron transport chain (GO:0022900)                                       | 1.91E-12    | 24  | 471 | 5.095541401 | 63   | 6609 | 0.953245574 |
| up pcc1-4 | energy coupled proton transport, down electrochemical gradient (GO:0015985) | 3.38E-06    | 11  | 471 | 2.335456476 | 30   | 6609 | 0.453926464 |
| up pcc1-4 | energy derivation by oxidation of organic compounds (GO:0015980)            | 2.56E-18    | 50  | 471 | 10.61571125 | 176  | 6609 | 2.663035255 |
| up pcc1-4 | energy reserve metabolic process (GO:0006112)                               | 0.007392357 | 8   | 471 | 1.6985138   | 41   | 6609 | 0.620366167 |
| up pcc1-4 | establishment of localization (GO:0051234)                                  | 0.001700714 | 116 | 471 | 24.62845011 | 1273 | 6609 | 19.26161295 |
| up pcc1-4 | ethanol metabolic process (GO:0006067)                                      | 0.007951975 | 4   | 471 | 0.8492569   | 12   | 6609 | 0.181570586 |
| up pcc1-4 | generation of precursor metabolites and energy (GO:0006091)                 | 7.91E-22    | 67  | 471 | 14.22505308 | 259  | 6609 | 3.918898472 |
| up pcc1-4 | glucan biosynthetic process (GO:0009250)                                    | 0.0027358   | 6   | 471 | 1.27388535  | 21   | 6609 | 0.317748525 |
| up pcc1-4 | glucan metabolic process (GO:0044042)                                       | 0.007392357 | 8   | 471 | 1.6985138   | 41   | 6609 | 0.620366167 |
| up pcc1-4 | glucose catabolic process (GO:0006007)                                      | 0.000748421 | 11  | 471 | 2.335456476 | 51   | 6609 | 0.771674989 |
| up pcc1-4 | glucose metabolic process (GO:0006006)                                      | 1.40E-05    | 20  | 471 | 4.246284501 | 98   | 6609 | 1.482826449 |
| up pcc1-4 | glutamate metabolic process (GO:0006536)                                    | 0.000142282 | 7   | 471 | 1.486199575 | 18   | 6609 | 0.272355878 |
| up pcc1-4 | glutamine family amino acid biosynthetic process (GO:0009084)               | 9.88E-12    | 16  | 471 | 3.397027601 | 29   | 6609 | 0.438795582 |
| up pcc1-4 | glutamine family amino acid metabolic process (GO:0009064)                  | 5.90E-15    | 27  | 471 | 5.732484076 | 65   | 6609 | 0.983507338 |
| up pcc1-4 | glutamine metabolic process (GO:0006541)                                    | 4.59E-05    | 9   | 471 | 1.910828025 | 26   | 6609 | 0.393402935 |
| up pcc1-4 | glycine catabolic process (GO:0006546)                                      | 0.001362794 | 3   | 471 | 0.636942675 | 4    | 6609 | 0.060523529 |
| up pcc1-4 | glycine metabolic process (GO:0006544)                                      | 0.002404086 | 4   | 471 | 0.8492569   | 9    | 6609 | 0.136177939 |
| up pcc1-4 | glycogen biosynthetic process (GO:0005978)                                  | 0.000936028 | 5   | 471 | 1.061571125 | 12   | 6609 | 0.181570586 |
| up pcc1-4 | glycogen metabolic process (GO:0005977)                                     | 0.003512224 | 7   | 471 | 1.486199575 | 29   | 6609 | 0.438795582 |
| up pcc1-4 | glycoside catabolic process (GO:0016139)                                    | 0.000579756 | 5   | 471 | 1.061571125 | 11   | 6609 | 0.166439703 |
| up pcc1-4 | glycoside metabolic process (GO:0016137)                                    | 0.001545762 | 6   | 471 | 1.27388535  | 19   | 6609 | 0.28748676  |
| up pcc1-4 | glyoxylate metabolic process (GO:0046487)                                   | 0.002404086 | 4   | 471 | 0.8492569   | 9    | 6609 | 0.136177939 |
| up pcc1-4 | heterocycle biosynthetic process (GO:0018130)                               | 7.46E-07    | 20  | 471 | 4.246284501 | 82   | 6609 | 1.240732335 |
| up pcc1-4 | heterocycle metabolic process (GO:0046483)                                  | 1.75E-13    | 52  | 471 | 11.0403397  | 242  | 6609 | 3.661673476 |
| up pcc1-4 | hexose catabolic process (GO:0019320)                                       | 0.000549033 | 12  | 471 | 2.547770701 | 57   | 6609 | 0.862460281 |
| up pcc1-4 | hexose metabolic process (GO:0019318)                                       | 2.08E-06    | 24  | 471 | 5.095541401 | 118  | 6609 | 1.785444091 |
| up pcc1-4 | histidine biosynthetic process (GO:0000105)                                 | 2.29E-06    | 7   | 471 | 1.486199575 | 11   | 6609 | 0.166439703 |
| up pcc1-4 | histidine family amino acid biosynthetic process (GO:0009076)               | 2.29E-06    | 7   | 471 | 1.486199575 | 11   | 6609 | 0.166439703 |
| up pcc1-4 | histidine family amino acid metabolic process (GO:0009075)                  | 2.29E-06    | 7   | 471 | 1.486199575 | 11   | 6609 | 0.166439703 |
| up pcc1-4 | histidine metabolic process (GO:0006547)                                    | 2.29E-06    | 7   | 471 | 1.486199575 | 11   | 6609 | 0.166439703 |
| up pcc1-4 | homocysteine metabolic process (GO:0050667)                                 | 0.000340383 | 4   | 471 | 0.8492569   | 6    | 6609 | 0.090785293 |
| up pcc1-4 | homoserine metabolic process (GO:0009092)                                   | 0.003782937 | 4   | 471 | 0.8492569   | 10   | 6609 | 0.151308821 |
| up pcc1-4 | hydrogen transport (GO:0006818)                                             | 7.43E-05    | 11  | 471 | 2.335456476 | 40   | 6609 | 0.605235285 |
| up pcc1-4 | indolalkylamine biosynthetic process (GO:0046219)                           | 0.000120246 | 4   | 471 | 0.8492569   | 5    | 6609 | 0.075654411 |
| up pcc1-4 | indolalkylamine metabolic process (GO:0006586)                              | 0.000936028 | 5   | 471 | 1.061571125 | 12   | 6609 | 0.181570586 |
| up pcc1-4 | indole and derivative metabolic process (GO:0042430)                        | 0.000936028 | 5   | 471 | 1.061571125 | 12   | 6609 | 0.181570586 |
| up pcc1-4 | indole derivative biosynthetic process (GO:0042435)                         | 0.000120246 | 4   | 471 | 0.8492569   | 5    | 6609 | 0.075654411 |
| up pcc1-4 | indole derivative metabolic process (GO:0042434)                            | 0.000936028 | 5   | 471 | 1.061571125 | 12   | 6609 | 0.181570586 |
| up pcc1-4 | inner mitochondrial membrane organization (GO:0007007)                      | 0.007083531 | 5   | 471 | 1.061571125 | 18   | 6609 | 0.272355878 |
| up pcc1-4 | ion transmembrane transport (GO:0034220)                                    | 0.000290082 | 11  | 471 | 2.335456476 | 46   | 6609 | 0.696020578 |
| up pcc1-4 | ion transport (GO:0006811)                                                  | 3.22E-14    | 49  | 471 | 10.40339703 | 210  | 6609 | 3.177485247 |
| up pcc1-4 | leucine biosynthetic process (GO:0009098)                                   | 0.003226616 | 3   | 471 | 0.636942675 | 5    | 6609 | 0.075654411 |
| up pcc1-4 | leucine metabolic process (GO:0006551)                                      | 0.001414856 | 4   | 471 | 0.8492569   | 8    | 6609 | 0.121047057 |

|           |                                                                                       |             |     |     |             |      |      |             |
|-----------|---------------------------------------------------------------------------------------|-------------|-----|-----|-------------|------|------|-------------|
| up pcc1-4 | malate metabolic process (GO:0006108)                                                 | 0.001362794 | 3   | 471 | 0.636942675 | 4    | 6609 | 0.060523529 |
| up pcc1-4 | maltose metabolic process (GO:0000023)                                                | 0.000548419 | 6   | 471 | 1.27388535  | 16   | 6609 | 0.242094114 |
| up pcc1-4 | metabolic process (GO:0008152)                                                        | 1.32E-05    | 337 | 471 | 71.54989384 | 4135 | 6609 | 62.56619761 |
| up pcc1-4 | methionine biosynthetic process (GO:0009086)                                          | 9.04E-07    | 12  | 471 | 2.547770701 | 32   | 6609 | 0.484188228 |
| up pcc1-4 | methionine metabolic process (GO:0006555)                                             | 2.98E-07    | 14  | 471 | 2.972399151 | 40   | 6609 | 0.605235285 |
| up pcc1-4 | mitochondrial ATP synthesis coupled electron transport (GO:0042775)                   | 1.42E-17    | 20  | 471 | 4.246284501 | 28   | 6609 | 0.4236647   |
| up pcc1-4 | mitochondrial electron transport, cytochrome c to oxygen (GO:0006123)                 | 7.99E-09    | 9   | 471 | 1.910828025 | 12   | 6609 | 0.181570586 |
| up pcc1-4 | mitochondrial electron transport, ubiquinol to cytochrome c (GO:0006122)              | 3.18E-11    | 10  | 471 | 2.123142251 | 11   | 6609 | 0.166439703 |
| up pcc1-4 | monocarboxylic acid metabolic process (GO:0032787)                                    | 4.09E-06    | 26  | 471 | 5.520169851 | 139  | 6609 | 2.103192616 |
| up pcc1-4 | monohydric alcohol metabolic process (GO:0034308)                                     | 0.007951975 | 4   | 471 | 0.8492569   | 12   | 6609 | 0.181570586 |
| up pcc1-4 | monosaccharide catabolic process (GO:0046365)                                         | 8.68E-05    | 14  | 471 | 2.972399151 | 62   | 6609 | 0.938114692 |
| up pcc1-4 | monosaccharide metabolic process (GO:0005996)                                         | 4.95E-07    | 27  | 471 | 5.732484076 | 133  | 6609 | 2.012407323 |
| up pcc1-4 | monovalent inorganic cation transport (GO:0015672)                                    | 0.000114517 | 13  | 471 | 2.760084926 | 56   | 6609 | 0.847329399 |
| up pcc1-4 | NADH oxidation (GO:0006116)                                                           | 0.003782937 | 4   | 471 | 0.8492569   | 10   | 6609 | 0.151308821 |
| up pcc1-4 | NADP metabolic process (GO:0006739)                                                   | 0.000166253 | 8   | 471 | 1.6985138   | 24   | 6609 | 0.363141171 |
| up pcc1-4 | NADPH regeneration (GO:0006740)                                                       | 0.000430735 | 7   | 471 | 1.486199575 | 21   | 6609 | 0.317748525 |
| up pcc1-4 | nicotinamide nucleotide metabolic process (GO:0046496)                                | 2.52E-05    | 13  | 471 | 2.760084926 | 49   | 6609 | 0.741413224 |
| up pcc1-4 | nitrogen compound metabolic process (GO:0006807)                                      | 1.07E-09    | 207 | 471 | 43.94904459 | 2062 | 6609 | 31.19987895 |
| up pcc1-4 | nucleobase, nucleoside and nucleotide biosynthetic process (GO:0034404)               | 0.000807015 | 20  | 471 | 4.246284501 | 130  | 6609 | 1.967014677 |
| up pcc1-4 | nucleobase, nucleoside and nucleotide metabolic process (GO:0055086)                  | 6.56E-19    | 61  | 471 | 12.95116773 | 246  | 6609 | 3.722197004 |
| up pcc1-4 | nucleobase, nucleoside, nucleotide and nucleic acid biosynthetic process (GO:0034654) | 0.000807015 | 20  | 471 | 4.246284501 | 130  | 6609 | 1.967014677 |
| up pcc1-4 | nucleoside phosphate metabolic process (GO:0006753)                                   | 7.10E-18    | 55  | 471 | 11.67728238 | 214  | 6609 | 3.238008776 |
| up pcc1-4 | nucleoside triphosphate biosynthetic process (GO:0009142)                             | 0.001052183 | 11  | 471 | 2.335456476 | 53   | 6609 | 0.801936753 |
| up pcc1-4 | nucleoside triphosphate metabolic process (GO:0009141)                                | 0.003922938 | 11  | 471 | 2.335456476 | 62   | 6609 | 0.938114692 |
| up pcc1-4 | nucleotide biosynthetic process (GO:0009165)                                          | 0.000680599 | 19  | 471 | 4.033970276 | 119  | 6609 | 1.800574974 |
| up pcc1-4 | nucleotide metabolic process (GO:0009117)                                             | 7.10E-18    | 55  | 471 | 11.67728238 | 214  | 6609 | 3.238008776 |
| up pcc1-4 | oligopeptide transport (GO:0006857)                                                   | 0.006112849 | 3   | 471 | 0.636942675 | 6    | 6609 | 0.090785293 |
| up pcc1-4 | oligosaccharide catabolic process (GO:0009313)                                        | 0.006290884 | 7   | 471 | 1.486199575 | 32   | 6609 | 0.484188228 |
| up pcc1-4 | organic acid biosynthetic process (GO:0016053)                                        | 1.32E-33    | 68  | 471 | 14.4373673  | 178  | 6609 | 2.693297019 |
| up pcc1-4 | organic acid catabolic process (GO:0016054)                                           | 8.48E-06    | 15  | 471 | 3.184713376 | 58   | 6609 | 0.877591164 |
| up pcc1-4 | organic acid metabolic process (GO:0006082)                                           | 4.05E-46    | 119 | 471 | 25.26539278 | 402  | 6609 | 6.082614616 |
| up pcc1-4 | organic acid transport (GO:0015849)                                                   | 0.000313701 | 16  | 471 | 3.397027601 | 86   | 6609 | 1.301255863 |
| up pcc1-4 | ornithine biosynthetic process (GO:0006592)                                           | 2.55E-05    | 4   | 471 | 0.8492569   | 4    | 6609 | 0.060523529 |
| up pcc1-4 | ornithine metabolic process (GO:0006591)                                              | 6.72E-08    | 7   | 471 | 1.486199575 | 8    | 6609 | 0.121047057 |
| up pcc1-4 | oxidation reduction (GO:0055114)                                                      | 8.50E-37    | 102 | 471 | 21.65605096 | 364  | 6609 | 5.507641095 |
| up pcc1-4 | oxidative phosphorylation (GO:0006119)                                                | 5.71E-22    | 32  | 471 | 6.794055202 | 59   | 6609 | 0.892722046 |
| up pcc1-4 | oxidoreduction coenzyme metabolic process (GO:0006733)                                | 3.71E-05    | 15  | 471 | 3.184713376 | 65   | 6609 | 0.983507338 |
| up pcc1-4 | oxoacid metabolic process (GO:0043436)                                                | 1.97E-35    | 103 | 471 | 21.86836518 | 383  | 6609 | 5.795127856 |
| up pcc1-4 | peptide transport (GO:0015833)                                                        | 0.002404086 | 4   | 471 | 0.8492569   | 9    | 6609 | 0.136177939 |
| up pcc1-4 | phosphate metabolic process (GO:0006796)                                              | 9.45E-06    | 42  | 471 | 8.917197452 | 295  | 6609 | 4.463610228 |
| up pcc1-4 | phosphatidylglycerol metabolic process (GO:0046471)                                   | 0.000749517 | 4   | 471 | 0.8492569   | 7    | 6609 | 0.105916175 |
| up pcc1-4 | phosphorus metabolic process (GO:0006793)                                             | 1.58E-07    | 47  | 471 | 9.978768577 | 300  | 6609 | 4.539264639 |
| up pcc1-4 | phosphorylation (GO:0016310)                                                          | 2.25E-08    | 40  | 471 | 8.492569002 | 220  | 6609 | 3.328794069 |
| up pcc1-4 | polyamine transport (GO:0015846)                                                      | 0.007951975 | 4   | 471 | 0.8492569   | 12   | 6609 | 0.181570586 |
| up pcc1-4 | positive regulation of transcription by nitrogen catabolites (GO:0090294)             | 0.005068891 | 2   | 471 | 0.42462845  | 2    | 6609 | 0.030261764 |
| up pcc1-4 | protein catabolic process (GO:0030163)                                                | 0.00019664  | 40  | 471 | 8.492569002 | 314  | 6609 | 4.751096989 |
| up pcc1-4 | proton transport (GO:0015992)                                                         | 5.75E-05    | 11  | 471 | 2.335456476 | 39   | 6609 | 0.590104403 |
| up pcc1-4 | purine nucleoside triphosphate biosynthetic process (GO:0009145)                      | 0.000521311 | 11  | 471 | 2.335456476 | 49   | 6609 | 0.741413224 |
| up pcc1-4 | purine nucleoside triphosphate metabolic process (GO:0009144)                         | 0.001052183 | 11  | 471 | 2.335456476 | 53   | 6609 | 0.801936753 |
| up pcc1-4 | purine nucleotide biosynthetic process (GO:0006164)                                   | 0.00017988  | 15  | 471 | 3.184713376 | 74   | 6609 | 1.119685278 |
| up pcc1-4 | purine nucleotide metabolic process (GO:0006163)                                      | 0.000130272 | 16  | 471 | 3.397027601 | 80   | 6609 | 1.21047057  |
| up pcc1-4 | purine ribonucleoside triphosphate biosynthetic process (GO:0009206)                  | 0.000521311 | 11  | 471 | 2.335456476 | 49   | 6609 | 0.741413224 |
| up pcc1-4 | purine ribonucleoside triphosphate metabolic process (GO:0009205)                     | 0.001052183 | 11  | 471 | 2.335456476 | 53   | 6609 | 0.801936753 |
| up pcc1-4 | purine ribonucleotide biosynthetic process (GO:0009152)                               | 0.000864557 | 13  | 471 | 2.760084926 | 68   | 6609 | 1.028899985 |
| up pcc1-4 | purine ribonucleotide metabolic process (GO:0009150)                                  | 0.001714516 | 13  | 471 | 2.760084926 | 73   | 6609 | 1.104554396 |
| up pcc1-4 | pyridine nucleotide metabolic process (GO:0019362)                                    | 1.02E-05    | 14  | 471 | 2.972399151 | 52   | 6609 | 0.786805871 |
| up pcc1-4 | pyruvate metabolic process (GO:0006090)                                               | 0.002834983 | 7   | 471 | 1.486199575 | 28   | 6609 | 0.4236647   |
| up pcc1-4 | regulation of apoptosis (GO:0042981)                                                  | 0.006112849 | 3   | 471 | 0.636942675 | 6    | 6609 | 0.090785293 |

|           |                                                               |             |     |     |             |      |      |             |
|-----------|---------------------------------------------------------------|-------------|-----|-----|-------------|------|------|-------------|
| up pcc1-4 | regulation of ATPase activity (GO:0043462)                    | 0.003226616 | 3   | 471 | 0.636942675 | 5    | 6609 | 0.075654411 |
| up pcc1-4 | regulation of cell death (GO:0010941)                         | 0.006112849 | 3   | 471 | 0.636942675 | 6    | 6609 | 0.090785293 |
| up pcc1-4 | regulation of programmed cell death (GO:0043067)              | 0.006112849 | 3   | 471 | 0.636942675 | 6    | 6609 | 0.090785293 |
| up pcc1-4 | respiratory electron transport chain (GO:0022904)             | 7.85E-16    | 20  | 471 | 4.246284501 | 32   | 6609 | 0.484188228 |
| up pcc1-4 | response to temperature stimulus (GO:0009266)                 | 0.000354876 | 11  | 471 | 2.335456476 | 47   | 6609 | 0.711115146 |
| up pcc1-4 | response to water (GO:0009415)                                | 0.00888779  | 7   | 471 | 1.486199575 | 34   | 6609 | 0.514449992 |
| up pcc1-4 | response to water deprivation (GO:0009414)                    | 0.000359817 | 3   | 471 | 0.636942675 | 3    | 6609 | 0.045392646 |
| up pcc1-4 | ribonucleoside triphosphate biosynthetic process (GO:0009201) | 0.000748421 | 11  | 471 | 2.335456476 | 51   | 6609 | 0.771674989 |
| up pcc1-4 | ribonucleoside triphosphate metabolic process (GO:0009199)    | 0.00145109  | 11  | 471 | 2.335456476 | 55   | 6609 | 0.832198517 |
| up pcc1-4 | ribonucleotide biosynthetic process (GO:0009260)              | 0.001064881 | 14  | 471 | 2.972399151 | 78   | 6609 | 1.180208806 |
| up pcc1-4 | ribonucleotide metabolic process (GO:0009259)                 | 0.001981554 | 14  | 471 | 2.972399151 | 83   | 6609 | 1.255863217 |
| up pcc1-4 | serine family amino acid biosynthetic process (GO:0009070)    | 0.000166253 | 8   | 471 | 1.6985138   | 24   | 6609 | 0.363141171 |
| up pcc1-4 | serine family amino acid catabolic process (GO:0009071)       | 0.003226616 | 3   | 471 | 0.636942675 | 5    | 6609 | 0.075654411 |
| up pcc1-4 | serine family amino acid metabolic process (GO:0009069)       | 1.51E-06    | 13  | 471 | 2.760084926 | 39   | 6609 | 0.590104403 |
| up pcc1-4 | small molecule biosynthetic process (GO:0044283)              | 4.85E-34    | 103 | 471 | 21.86836518 | 396  | 6609 | 5.991829324 |
| up pcc1-4 | small molecule catabolic process (GO:0044282)                 | 1.81E-10    | 35  | 471 | 7.430997877 | 150  | 6609 | 2.26963232  |
| up pcc1-4 | small molecule metabolic process (GO:0044281)                 | 2.15E-51    | 197 | 471 | 41.82590234 | 963  | 6609 | 14.57103949 |
| up pcc1-4 | sulfate assimilation (GO:0000103)                             | 0.005613326 | 4   | 471 | 0.8492569   | 11   | 6609 | 0.166439703 |
| up pcc1-4 | sulfur amino acid biosynthetic process (GO:0000097)           | 7.30E-06    | 12  | 471 | 2.547770701 | 38   | 6609 | 0.574973521 |
| up pcc1-4 | sulfur amino acid catabolic process (GO:0000098)              | 0.005068891 | 2   | 471 | 0.42462845  | 2    | 6609 | 0.030261764 |
| up pcc1-4 | sulfur amino acid metabolic process (GO:0000096)              | 6.07E-07    | 15  | 471 | 3.184713376 | 48   | 6609 | 0.726282342 |
| up pcc1-4 | sulfur compound biosynthetic process (GO:0044272)             | 1.46E-06    | 18  | 471 | 3.821656051 | 71   | 6609 | 1.074292631 |
| up pcc1-4 | sulfur metabolic process (GO:0006790)                         | 2.36E-06    | 22  | 471 | 4.670912951 | 103  | 6609 | 1.558480859 |
| up pcc1-4 | transmembrane transport (GO:0055085)                          | 1.29E-09    | 61  | 471 | 12.95116773 | 386  | 6609 | 5.840520502 |
| up pcc1-4 | transport (GO:0006810)                                        | 0.000424009 | 116 | 471 | 24.62845011 | 1228 | 6609 | 18.58072326 |
| up pcc1-4 | trehalose catabolic process (GO:0005993)                      | 0.000359817 | 3   | 471 | 0.636942675 | 3    | 6609 | 0.045392646 |
| up pcc1-4 | trehalose metabolic process (GO:0005991)                      | 0.005613326 | 4   | 471 | 0.8492569   | 11   | 6609 | 0.166439703 |
| up pcc1-4 | tricarboxylic acid cycle (GO:0006099)                         | 3.38E-06    | 11  | 471 | 2.335456476 | 30   | 6609 | 0.453926464 |
| up pcc1-4 | tryptophan biosynthetic process (GO:0000162)                  | 0.000120246 | 4   | 471 | 0.8492569   | 5    | 6609 | 0.075654411 |
| up pcc1-4 | tryptophan metabolic process (GO:0006568)                     | 0.000936028 | 5   | 471 | 1.061571125 | 12   | 6609 | 0.181570586 |
| up pcc1-4 | urea catabolic process (GO:0043419)                           | 0.005068891 | 2   | 471 | 0.42462845  | 2    | 6609 | 0.030261764 |
| up pcc1-4 | urea metabolic process (GO:0019627)                           | 0.005068891 | 2   | 471 | 0.42462845  | 2    | 6609 | 0.030261764 |
| up pcc1-4 | vacuolar protein catabolic process (GO:0007039)               | 1.64E-11    | 32  | 471 | 6.794055202 | 118  | 6609 | 1.785444091 |
| up pcc1-4 | vitamin biosynthetic process (GO:0009110)                     | 7.18E-05    | 14  | 471 | 2.972399151 | 61   | 6609 | 0.92298381  |
| up pcc1-4 | vitamin metabolic process (GO:0006766)                        | 6.66E-06    | 17  | 471 | 3.609341826 | 71   | 6609 | 1.074292631 |
| up pcc1-4 | water-soluble vitamin biosynthetic process (GO:0042364)       | 7.18E-05    | 14  | 471 | 2.972399151 | 61   | 6609 | 0.92298381  |
| up pcc1-4 | water-soluble vitamin metabolic process (GO:0006767)          | 1.29E-05    | 16  | 471 | 3.397027601 | 67   | 6609 | 1.013769103 |
